# Supplementary material
Source: publisher site journal article supplement (http://e-cmh.org/upload/media/cmh-2023-0076-Supplementary-Table-3.pdf)
Supplement: Supplementary file 1 [file cmh-2023-0076-Supplementary-Table-3.pdf]

**Supplementary Table 3.** Logistic regression analysis of best treatment response

| Characteristics            | Unmatched cohort |         | After IPTW       |         | After PSM        |         |
|----------------------------|------------------|---------|------------------|---------|------------------|---------|
|                            | OR (95% CI)      | P-value | OR (95% CI)      | P-value | OR (95% CI)      | P-value |
| TARE vs. TKI               | 11.7 (5.64–24.1) | <0.001  | 8.05 (3.35–19.3) | <0.001  | 7.41 (3.09–17.8) | <0.001  |
| Female vs. Male            | 1.59 (0.75–3.38) | 0.23    | 1.33 (0.58–3.06) | 0.51    | 0.79 (0.26–2.44) | 0.68    |
| ECOG PS                    |                  |         |                  |         |                  |         |
| 0                          | [Reference]      |         | [Reference]      |         | [Reference]      |         |
| 1                          | 0.40 (0.23–0.71) | 0.002   | 0.47 (0.24–0.91) | 0.03    | 0.53 (0.25–1.13) | 0.10    |
| 2                          | 0.32 (0.03–3.13) | 0.32    | 0.38 (0.04–3.91) | 0.41    | NA               | NA      |
| Child–Pugh score           |                  |         |                  |         |                  |         |
| 5                          | [Reference]      |         | [Reference]      |         | [Reference]      |         |
| 6                          | 0.33 (0.15–0.73) | 0.007   | 0.57 (0.23–1.43) | 0.23    | 0.61 (0.23–1.61) | 0.31    |
| 7                          | 0.19 (0.04–0.87) | 0.03    | 0.11 (0.02–0.60) | 0.01    | 0.52 (0.10–2.73) | 0.44    |
| Hepatic encephalopathy     | 0.93 (0.35–2.50) | 0.89    | 0.71 (0.24–2.12) | 0.54    | 0.28 (0.03–2.39) | 0.24    |
| Ascites                    | 0.49 (0.22–1.07) | 0.08    | 0.36 (0.15–0.88) | 0.03    | 0.42 (0.13–1.37) | 0.15    |
| Tumor type                 |                  |         |                  |         |                  |         |
| Well-defined (nodular)     | [Reference]      |         | [Reference]      |         | [Reference]      |         |
| Ill-defined (infiltrative) | 0.96 (0.56–1.66) | 0.88    | 1.23 (0.65–2.33) | 0.52    | 1.57 (0.74–3.35) | 0.24    |
| Tumor size, cm             | 0.96 (0.90–1.04) | 0.31    | 0.98 (0.90–1.06) | 0.53    | 0.97 (0.88–1.06) | 0.50    |
| Tumor number               |                  |         |                  |         |                  |         |
| 1                          | [Reference]      |         | [Reference]      |         | [Reference]      |         |
| 2                          | 0.88 (0.37–2.09) | 0.78    | 1.09 (0.38–3.13) | 0.87    | 1.29 (0.36–4.54) | 0.70    |
| ≥3                         | 0.25 (0.14–0.47) | <0.001  | 0.52 (0.26–1.06) | 0.07    | 0.69 (0.30–1.55) | 0.36    |
| Tumor involvement          |                  |         |                  |         |                  |         |
| Bilobar                    | [Reference]      |         | [Reference]      |         | [Reference]      |         |
| Unilobar (Right only)      | 1.86 (1.02–3.40) | 0.045   | 1.05 (0.53–2.08) | 0.89    | 1.11 (0.50–2.46) | 0.79    |
| Unilobar (Left only)       | 5.54 (2.14–14.3) | <0.001  | 6.74 (2.38–19.1) | <0.001  | 2.47 (0.66–9.25) | 0.18    |
| PVTT                       |                  |         |                  |         |                  |         |
| Vp1                        | [Reference]      |         | [Reference]      |         | [Reference]      |         |
| Vp2                        | 0.91 (0.31–2.65) | 0.86    | 0.76 (0.24–2.36) | 0.63    | 1.73 (0.38–7.86) | 0.48    |
| Vp3                        | 0.51 (0.18–1.47) | 0.21    | 0.44 (0.15–1.33) | 0.15    | 0.86 (0.20–3.76) | 0.84    |
| Albumin, g/dL              | 3.06 (1.58–5.90) | 0.001   | 2.29 (1.10–4.73) | 0.03    | 1.66 (0.71–3.90) | 0.24    |
| Bilirubin, mg/dL           | 0.31 (0.15–0.62) | 0.001   | 0.29 (0.12–0.67) | 0.004   | 0.24 (0.08–0.66) | 0.006   |
| PT, INR                    | 0.82 (0.18–3.69) | 0.80    | 0.76 (0.08–7.47) | 0.81    | 0.17 (0.01–4.35) | 0.29    |

A higher odds ratio indicates an increased likelihood of a higher object response rate.

CI, confidence interval; ECOG, Eastern Cooperative Oncology Group; IPTW, inverse probability of treatment weighting; NA, not applicable; OR, odds ratio; PS, performance status; PSM, propensity score matching; PT, prothrombin time; PVTT, portal vein tumor thrombosis; TARE, transarterial radioembolization; TKI, tyrosine kinase inhibitor.
